# Supplementary material
Source: publisher site journal article supplement (https://www.dovepress.com/article/594777)
Supplement: Supplementary file 1 [file 594777%20Supplementary%20Material.docx]

**Supplementary Table S1.** Age-standardized mortality and DALYs of CML and their AAPCs in individuals aged ≥65 years at the global, sex-, age-, and SDI-specific levels, 1990–2021.

| **Category** | **Number of deaths in 1990 (thousands) (95% UI)** | **Age-standardized mortality rate in 1990 (per 100,000) (95% UI)** | **Number of deaths in 2021 (thousands) (95% UI)** | **Age-standardized mortality rate in 2021 (per 100,000) (95% UI)** | **Mortality AAPC (1990–2021) (%/year) (95% CI)** | **DALYs in 1990 (thousands) (95% UI)** | **Age-standardized DALY rate in 1990 (per 100,000) (95% UI)** | **DALYs in 2021 (thousands) (95% UI)** | **Age-standardized DALY rate in 2021 (per 100,000) (95% UI)** | **DALY AAPC (1990–2021) (%/year) (95% CI)** |
| --- | --- | --- | --- | --- | --- | --- | --- | --- | --- | --- |
| Global | 12477.02 (10480.08 to 14476.02) | 4.22 (3.54 to 4.89) | 12989.34 (9878.32 to 16223.7) | 1.78 (1.36 to 2.21) | -2.73 (-2.87 to -2.6) | 214785.1 (179979.94 to 250734.56) | 68.05 (57.01 to 79.23) | 207179.55 (155681.55 to 263041.42) | 27.57 (20.77 to 34.85) | -2.86 (-3 to -2.71) |
| Sex |  |  |  |  |  |  |  |  |  |  |
| Female | 5972.83 (4950.17 to 7359.82) | 3.42 (2.83 to 4.2) | 5907.66 (4490.71 to 7922.57) | 1.41 (1.07 to 1.89) | -2.85 (-2.97 to -2.72) | 100090.95 (82878.04 to 124804.39) | 54.95 (45.44 to 68.35) | 91427.95 (69721.64 to 125902.37) | 21.77 (16.61 to 29.96) | -2.94 (-3.14 to -2.74) |
| Male | 6504.19 (5086.4 to 7771.15) | 5.49 (4.34 to 6.5) | 7081.69 (4553.14 to 9398.21) | 2.31 (1.52 to 3.02) | -2.75 (-2.89 to -2.61) | 114694.15 (88610.38 to 138416.68) | 87.18 (68.01 to 104.42) | 115751.6 (72051.02 to 157232.6) | 35.19 (22.33 to 47.18) | -2.87 (-3 to -2.75) |
| Age group (years) |  |  |  |  |  |  |  |  |  |  |
| 65-69 | 2700.96 (2191.57 to 3228.24) | 2.19 (1.77 to 2.61) | 2112.18 (1509.65 to 2854.95) | 0.77 (0.55 to 1.03) | -3.34 (-3.49 to -3.2) | 66730.3 (54319.21 to 79919.07) | 53.98 (43.94 to 64.65) | 52438.38 (37528.4 to 70554.2) | 19.01 (13.61 to 25.58) | -3.33 (-3.47 to -3.18) |
| 70-74 | 2574.43 (2141.71 to 3041.38) | 3.04 (2.53 to 3.59) | 2453.75 (1811.54 to 3244.03) | 1.19 (0.88 to 1.58) | -2.98 (-3.09 to -2.86) | 52403.71 (43726.88 to 61952.91) | 61.9 (51.65 to 73.18) | 50212.39 (37113.63 to 66299.01) | 24.39 (18.03 to 32.21) | -2.97 (-3.12 to -2.81) |
| 75-79 | 2838.39 (2462.41 to 3254.76) | 4.61 (4 to 5.29) | 2364.65 (1764.41 to 2905.17) | 1.79 (1.34 to 2.2) | -3.03 (-3.19 to -2.86) | 46199.94 (40061.78 to 52827.5) | 75.05 (65.08 to 85.82) | 38736.07 (28824.58 to 47674.34) | 29.37 (21.86 to 36.15) | -3 (-3.13 to -2.88) |
| 80-84 | 2328.42 (2000.38 to 2635.16) | 6.58 (5.65 to 7.45) | 2478.95 (2004.51 to 2989.71) | 2.83 (2.29 to 3.41) | -2.7 (-2.88 to -2.53) | 29702.8 (25493.76 to 33558.61) | 83.96 (72.07 to 94.86) | 31713.42 (25662.74 to 38239.38) | 36.21 (29.3 to 43.66) | -2.69 (-2.84 to -2.55) |
| 85-89 | 1403.08 (1173.65 to 1589.16) | 9.29 (7.77 to 10.52) | 2020.24 (1598.74 to 2405.46) | 4.42 (3.5 to 5.26) | -2.36 (-2.59 to -2.1) | 14259.78 (11939.41 to 16164.98) | 94.37 (79.01 to 106.97) | 20607.34 (16246.92 to 24538.59) | 45.07 (35.53 to 53.67) | -2.35 (-2.55 to -2.2) |
| 90-94 | 514.44 (421.92 to 590.95) | 12.01 (9.85 to 13.79) | 1190.22 (921.41 to 1391.31) | 6.65 (5.15 to 7.78) | -1.91 (-2.08 to -1.73) | 4519.09 (3705.75 to 5184.14) | 105.46 (86.48 to 120.98) | 10450.37 (8103.05 to 12193.87) | 58.42 (45.3 to 68.16) | -1.91 (-2.08 to -1.74) |
| ≥95 | 117.31 (88.43 to 136.37) | 11.52 (8.69 to 13.4) | 369.35 (268.06 to 433.08) | 6.78 (4.92 to 7.95) | -1.71 (-1.97 to -1.44) | 969.49 (733.15 to 1127.36) | 95.23 (72.01 to 110.73) | 3021.6 (2202.23 to 3542.02) | 55.44 (40.41 to 64.99) | -1.74 (-2.02 to -1.47) |
| SDI quintiles |  |  |  |  |  |  |  |  |  |  |
| High | 6602.68 (5858.12 to 7397.88) | 6.41 (5.67 to 7.19) | 4523.5 (3767.17 to 5129.5) | 2.02 (1.69 to 2.29) | -3.67 (-3.83 to -3.5) | 109159.58 (97888.8 to 122176.63) | 104.84 (93.88 to 117.36) | 64978.77 (55182.44 to 73364.78) | 30.31 (25.9 to 34.19) | -3.93 (-4.15 to -3.71) |
| High-middle | 2897.83 (2459.27 to 3403.85) | 3.77 (3.19 to 4.42) | 2649.16 (2081.08 to 3196.29) | 1.51 (1.19 to 1.82) | -2.87 (-3.15 to -2.58) | 51244.89 (43317.45 to 60705.87) | 62.7 (52.96 to 74.07) | 42542 (33248.25 to 51697.67) | 23.65 (18.49 to 28.7) | -3.06 (-3.33 to -2.8) |
| Middle | 1558.38 (1003.29 to 2050.65) | 2.34 (1.51 to 3.05) | 2966.52 (1930.08 to 4109.28) | 1.43 (0.94 to 1.97) | -1.57 (-1.73 to -1.41) | 28310.36 (18149.66 to 37518.09) | 38.06 (24.48 to 50.11) | 50297.83 (32394.32 to 70294.59) | 22.71 (14.71 to 31.58) | -1.66 (-1.84 to -1.48) |
| Low-middle | 1111.56 (645.06 to 1720.94) | 2.83 (1.65 to 4.38) | 2305.39 (1390.05 to 3576.13) | 2.27 (1.37 to 3.51) | -0.72 (-1.14 to -0.29) | 20304.62 (11724.85 to 31503.04) | 46.98 (27.22 to 72.79) | 39689.87 (23906.86 to 61906.49) | 36.22 (21.83 to 56.27) | -0.8 (-0.93 to -0.68) |
| Low | 287.34 (147.01 to 549.19) | 2.03 (1.04 to 3.92) | 527.76 (285.24 to 909.36) | 1.66 (0.9 to 2.82) | -0.66 (-1.04 to -0.28) | 5433.05 (2773.42 to 10318.48) | 34.16 (17.46 to 65.35) | 9394.06 (5071.52 to 16453.41) | 26.74 (14.44 to 46.19) | -0.77 (-0.97 to -0.57) |

**Abbreviations:** AAPC, average annual percentage change; CI, confidence interval; CML, chronic myeloid leukemia; DALY, disability-adjusted life year; SDI, sociodemographic index; UI, uncertainty interval.

**Supplementary Table S2.** Age-standardized mortality and DALYs of CML and their AAPCs in individuals aged ≥65 years across 21 GBD regions, 1990–2021.

| Region | Number of deaths in 1990 (thousands) (95% UI) | Age-standardized mortality rate in 1990 (per 100,000) (95% UI) | Number of deaths in 2021 (thousands) (95% UI) | Age-standardized mortality rate in 2021 (per 100,000) (95% UI) | Mortality AAPC (1990–2021) (%/year) (95% CI) | DALYs in 1990 (thousands) (95% UI) | Age-standardized DALY rate in 1990 (per 100,000) (95% UI) | DALYs in 2021 (thousands) (95% UI) | Age-standardized DALY rate in 2021 (per 100,000) (95% UI) | DALY AAPC (1990–2021) (%/year) (95% CI) |
| --- | --- | --- | --- | --- | --- | --- | --- | --- | --- | --- |
| Andean Latin America | 42.63 (26.56 to 66.97) | 2.75 (1.72 to 4.31) | 118.49 (71.03 to 180) | 2.4 (1.44 to 3.65) | -0.31 (-0.95 to 0.33) | 742.27 (458.86 to 1180.57) | 46.54 (28.82 to 73.83) | 1951.69 (1155.89 to 2993.38) | 39.13 (23.21 to 59.96) | -0.47 (-1.11 to 0.18) |
| High-income Asia Pacific | 587.57 (519.52 to 647.23) | 3.62 (3.17 to 3.99) | 659.09 (505.96 to 778.08) | 1.11 (0.87 to 1.31) | -3.8 (-4.1 to -3.51) | 9960.67 (8869.36 to 11004.53) | 58.5 (51.84 to 64.65) | 8439.89 (6642.26 to 10015.26) | 15.71 (12.59 to 18.76) | -4.17 (-4.49 to -3.85) |
| Central Asia | 52.84 (38.71 to 71.45) | 1.52 (1.11 to 2.05) | 55.82 (43.86 to 72.68) | 0.95 (0.75 to 1.23) | -1.51 (-1.95 to -1.06) | 1029.41 (752.36 to 1393.99) | 29.36 (21.42 to 39.79) | 1066.16 (833.1 to 1402.16) | 17.25 (13.53 to 22.54) | -1.72 (-2 to -1.44) |
| Eastern Sub-Saharan Africa | 60.32 (24.79 to 141.94) | 1.19 (0.48 to 2.83) | 88.2 (36.51 to 200.05) | 0.83 (0.34 to 1.87) | -1.15 (-1.22 to -1.08) | 1174.44 (488.79 to 2754.99) | 21.18 (8.64 to 49.9) | 1611.47 (671.04 to 3694.65) | 13.96 (5.77 to 31.71) | -1.33 (-1.4 to -1.26) |
| East Asia | 765.18 (355.16 to 1164.62) | 1.25 (0.57 to 1.9) | 924.55 (533.8 to 1592.13) | 0.49 (0.28 to 0.84) | -2.98 (-3.36 to -2.6) | 14696.32 (6902.71 to 22386.03) | 21.71 (10.07 to 33.03) | 16480.93 (9529.8 to 28714.98) | 8.27 (4.78 to 14.31) | -3.09 (-3.45 to -2.74) |
| Southern Sub-Saharan Africa | 4.19 (1.1 to 10.07) | 0.23 (0.06 to 0.56) | 7.09 (3.19 to 12.64) | 0.19 (0.08 to 0.33) | -0.66 (-0.96 to -0.35) | 65.58 (18.56 to 156.75) | 3.37 (0.92 to 8.08) | 118.15 (54.02 to 211.57) | 2.85 (1.28 to 5.08) | -0.54 (-0.78 to -0.3) |
| Caribbean | 124.61 (103.84 to 148.27) | 5.8 (4.83 to 6.9) | 176.29 (140.29 to 215.96) | 3.67 (2.92 to 4.49) | -1.3 (-2 to -0.6) | 2109.82 (1755.83 to 2519.61) | 94.4 (78.54 to 112.75) | 2891.86 (2303.86 to 3545.53) | 60.62 (48.3 to 74.34) | -1.28 (-1.97 to -0.58) |
| Tropical Latin America | 278.08 (244.14 to 310.16) | 4.32 (3.76 to 4.83) | 493.59 (409.77 to 574.21) | 2.3 (1.91 to 2.68) | -1.95 (-2.12 to -1.77) | 4948.57 (4361.6 to 5513.86) | 71.22 (62.51 to 79.45) | 7821.07 (6575.54 to 9078.65) | 35.79 (30.05 to 41.55) | -2.15 (-2.32 to -1.98) |
| Central Sub-Saharan Africa | 5.55 (1.65 to 14.09) | 0.42 (0.12 to 1.11) | 10.74 (3.08 to 27.21) | 0.35 (0.1 to 0.9) | -0.59 (-0.7 to -0.48) | 110.84 (32.89 to 279) | 7.29 (2.13 to 18.79) | 204.54 (58.56 to 514.11) | 5.97 (1.71 to 15.18) | -0.64 (-0.76 to -0.52) |
| North Africa and Middle East | 1062.87 (572.2 to 1819.08) | 4.92 (2.68 to 8.48) | 2111.85 (1103.19 to 3540.85) | 3.51 (1.85 to 5.88) | -1.09 (-1.18 to -1) | 19017.46 (10123.35 to 32343.89) | 80.12 (43.09 to 137.08) | 36103.98 (18543.8 to 60567.14) | 55.58 (28.88 to 93.25) | -1.15 (-1.37 to -0.93) |
| Southeast Asia | 534.8 (234.83 to 829.43) | 3.16 (1.38 to 4.84) | 962.41 (495.3 to 1403.32) | 2.1 (1.08 to 3.06) | -1.31 (-1.47 to -1.14) | 9799.72 (4314.39 to 15369.41) | 53.5 (23.5 to 83.27) | 16901.86 (8734.08 to 24711.62) | 34.22 (17.64 to 49.97) | -1.44 (-1.61 to -1.27) |
| Western Europe | 4215.86 (3652.94 to 4889.28) | 7.48 (6.47 to 8.67) | 2584.58 (2077.25 to 3068.6) | 2.43 (1.96 to 2.9) | -3.53 (-3.82 to -3.25) | 68189.63 (59451.41 to 78947.72) | 121.01 (105.48 to 140.1) | 35748.9 (28907 to 42563.21) | 36.05 (29.21 to 43.02) | -3.82 (-4.08 to -3.56) |
| Central Europe | 615.54 (532.28 to 732.68) | 4.92 (4.24 to 5.88) | 385.9 (329.16 to 448.11) | 1.74 (1.48 to 2.02) | -3.32 (-3.77 to -2.86) | 10811.52 (9326.57 to 12900.47) | 82.54 (71.09 to 98.69) | 6280.8 (5372.02 to 7307.14) | 28.19 (24.11 to 32.79) | -3.38 (-3.58 to -3.17) |
| Eastern Europe | 614.01 (463.8 to 825.94) | 2.6 (1.96 to 3.49) | 645.08 (545.44 to 764.79) | 1.96 (1.66 to 2.32) | -0.91 (-1.42 to -0.41) | 11712.46 (8774.63 to 15845.31) | 49.01 (36.72 to 66.33) | 11616.31 (9777.33 to 13855.53) | 34.89 (29.41 to 41.55) | -1.11 (-1.65 to -0.57) |
| Oceania | 8.35 (4.71 to 14.04) | 4.49 (2.6 to 7.47) | 15.77 (9.45 to 24.6) | 3.45 (2.07 to 5.36) | -0.88 (-0.92 to -0.83) | 170.37 (95.12 to 288.14) | 81.73 (46.51 to 137.06) | 309.26 (184.94 to 483.98) | 61.8 (37.02 to 96.34) | -0.93 (-0.98 to -0.89) |
| South Asia | 2074.85 (1083.39 to 3372.98) | 3.04 (1.59 to 4.94) | 4901.93 (2628.53 to 7690.38) | 2.38 (1.27 to 3.69) | -0.82 (-1.35 to -0.28) | 37643.82 (19569.32 to 61243.6) | 49.05 (25.56 to 79.79) | 83620.99 (44893.49 to 133059) | 37.07 (19.89 to 58.47) | -0.92 (-1.34 to -0.49) |
| Central Latin America | 207.63 (185.99 to 230.28) | 3.41 (3.05 to 3.79) | 425.83 (362.37 to 494.9) | 2.07 (1.76 to 2.41) | -1.62 (-1.77 to -1.46) | 3635.77 (3265.71 to 4033.13) | 57.15 (51.26 to 63.41) | 7053.6 (6029.22 to 8209.09) | 33.66 (28.76 to 39.16) | -1.71 (-1.97 to -1.45) |
| Australasia | 170.94 (140.79 to 203.9) | 8.13 (6.66 to 9.72) | 133.89 (91.94 to 184.34) | 2.38 (1.63 to 3.29) | -3.96 (-4.18 to -3.73) | 2769.58 (2289.05 to 3297.11) | 126.81 (104.48 to 151.18) | 1804.67 (1219.26 to 2519.3) | 33.04 (22.25 to 46.25) | -4.32 (-4.58 to -4.05) |
| Southern Latin America | 268.48 (199.34 to 355.5) | 6.89 (5.12 to 9.12) | 216.1 (163.6 to 282.12) | 2.62 (1.98 to 3.42) | -3.08 (-3.38 to -2.78) | 4604.51 (3402.55 to 6116.45) | 113.47 (83.95 to 150.67) | 3283.56 (2474.58 to 4305.97) | 40.14 (30.24 to 52.66) | -3.25 (-3.55 to -2.94) |
| High-income North America | 2339.62 (2112.6 to 2511.97) | 6.82 (6.14 to 7.32) | 1559.2 (1325.42 to 1719.73) | 2.4 (2.04 to 2.64) | -3.34 (-3.57 to -3.11) | 39707.57 (36433.14 to 42365.95) | 115.27 (105.66 to 123.02) | 23380.38 (20375.46 to 25598.17) | 36.25 (31.65 to 39.67) | -3.67 (-3.88 to -3.46) |
| Western Sub-Saharan Africa | 11.98 (4.57 to 30.43) | 0.2 (0.08 to 0.5) | 19.83 (8.26 to 48.86) | 0.16 (0.07 to 0.4) | -0.67 (-0.77 to -0.58) | 215.43 (81.78 to 552.47) | 3.29 (1.25 to 8.4) | 351.97 (144.91 to 868.99) | 2.66 (1.1 to 6.58) | -0.69 (-0.77 to -0.6) |

**Abbreviations:** AAPC, average annual percentage change; CI, confidence interval; CML, chronic myeloid leukemia; DALY, disability-adjusted life year; GBD, Global Burden of Disease; UI, uncertainty interval.

**Supplementary Table S3.** Age-standardized prevalence, mortality, and DALY rates of CML in individuals aged ≥65 years by sex across 21 GBD regions, 2021.

| Region | Male | | | Female | | |
| --- | --- | --- | --- | --- | --- | --- |
|  | **Prevalence** (per 100,000) (95% UI) | **Mortality** (per 100,000) (95% UI) | **DALYs** (per 100,000) (95% UI) | **Prevalence** (per 100,000) (95% UI) | **Mortality** (per 100,000) (95% UI) | **DALYs** (per 100,000) (95% UI) |
| Andean Latin America | 2.53 (1.12 to 4.35) | 3.06 (1.4 to 5.15) | 50.21 (22.61 to 85.66) | 1.56 (0.78 to 2.79) | 1.83 (0.96 to 3.16) | 29.34 (15.03 to 51.26) |
| Australasia | 7.55 (4.53 to 11.69) | 3.55 (2.28 to 5.3) | 49.19 (30.7 to 75.07) | 3.47 (1.97 to 5.75) | 1.47 (0.85 to 2.35) | 19.73 (11.21 to 31.94) |
| Caribbean | 4.64 (3.46 to 6.02) | 4.51 (3.33 to 5.91) | 75.68 (55.71 to 99.67) | 3.22 (2.37 to 4.25) | 2.96 (2.2 to 3.89) | 47.75 (35.53 to 62.87) |
| Central Asia | 0.98 (0.74 to 1.37) | 1.1 (0.82 to 1.54) | 20.09 (14.92 to 28.42) | 0.83 (0.64 to 1.09) | 0.84 (0.65 to 1.1) | 15.35 (11.76 to 20.24) |
| Central Europe | 3.64 (2.9 to 4.44) | 2.27 (1.86 to 2.69) | 36.92 (30.3 to 43.92) | 2.57 (2.09 to 3.2) | 1.4 (1.17 to 1.67) | 22.3 (18.66 to 26.54) |
| Central Latin America | 2.23 (1.78 to 2.76) | 2.68 (2.16 to 3.26) | 43.31 (34.86 to 52.88) | 1.44 (1.16 to 1.75) | 1.59 (1.29 to 1.92) | 25.84 (21.14 to 31.18) |
| Central Sub-Saharan Africa | 0.16 (0.01 to 0.56) | 0.26 (0.01 to 0.9) | 4.43 (0.19 to 15.12) | 0.27 (0.07 to 0.86) | 0.41 (0.1 to 1.32) | 7.05 (1.69 to 22.71) |
| East Asia | 1.06 (0.27 to 1.93) | 0.64 (0.19 to 1.21) | 10.16 (2.88 to 19.72) | 0.94 (0.49 to 1.6) | 0.4 (0.23 to 0.75) | 6.88 (4 to 12.93) |
| Eastern Europe | 3.71 (3.01 to 4.54) | 2.76 (2.24 to 3.37) | 49.19 (39.54 to 60.4) | 2.47 (1.99 to 3.06) | 1.56 (1.27 to 1.96) | 27.43 (22.04 to 34.61) |
| Eastern Sub-Saharan Africa | 0.57 (0.1 to 1.71) | 0.91 (0.15 to 2.57) | 14.96 (2.56 to 42.71) | 0.51 (0.19 to 1.5) | 0.78 (0.29 to 2.28) | 13.2 (4.8 to 38.82) |
| High-income Asia Pacific | 4.34 (3.32 to 5.56) | 1.64 (1.34 to 1.96) | 23.39 (19.05 to 28.51) | 2.12 (1.48 to 2.95) | 0.74 (0.52 to 0.96) | 9.97 (7.18 to 13.13) |
| High-income North America | 16.17 (14.41 to 17.75) | 3.09 (2.69 to 3.41) | 47.44 (41.91 to 52.14) | 4.42 (3.69 to 5.12) | 1.87 (1.52 to 2.14) | 27.43 (22.85 to 31.05) |
| North Africa and Middle East | 3.87 (1.34 to 7.8) | 4.27 (1.47 to 8.4) | 69.09 (23.93 to 136.5) | 2.58 (1.21 to 4.12) | 2.74 (1.31 to 4.54) | 42.15 (19.26 to 70.48) |
| Oceania | 0.43 (0.06 to 1.66) | 0.56 (0.07 to 2.13) | 11.7 (1.52 to 44.66) | 4.54 (2.77 to 6.73) | 6.42 (3.95 to 9.63) | 114.58 (70.66 to 172.37) |
| South Asia | 1.91 (0.53 to 3.45) | 2.99 (0.84 to 5.23) | 45.59 (12.52 to 82.26) | 1.28 (0.72 to 2.24) | 1.88 (1.06 to 3.25) | 29.73 (16.99 to 52.16) |
| Southeast Asia | 1.82 (0.37 to 3.23) | 2.36 (0.47 to 4.05) | 37.64 (7.6 to 65.14) | 1.56 (0.87 to 2.81) | 1.94 (1.08 to 3.49) | 31.83 (17.96 to 57.75) |
| Southern Latin America | 3.36 (2.28 to 4.71) | 3.52 (2.42 to 4.97) | 53.89 (36.51 to 76.51) | 2.17 (1.41 to 3.15) | 2.03 (1.32 to 2.93) | 30.5 (19.69 to 44.47) |
| Southern Sub-Saharan Africa | 0.12 (0.02 to 0.28) | 0.18 (0.03 to 0.44) | 2.77 (0.44 to 6.75) | 0.12 (0.05 to 0.25) | 0.19 (0.08 to 0.37) | 2.9 (1.26 to 5.69) |
| Tropical Latin America | 2.31 (1.87 to 2.78) | 3.07 (2.49 to 3.68) | 47.1 (38.46 to 56.53) | 1.46 (1.13 to 1.82) | 1.78 (1.37 to 2.21) | 27.65 (21.67 to 34.46) |
| Western Europe | 11.4 (8.88 to 14.55) | 3.32 (2.62 to 4.11) | 48.89 (38.38 to 61.09) | 8.28 (6.35 to 10.47) | 1.81 (1.39 to 2.25) | 26.26 (20.43 to 32.86) |
| Western Sub-Saharan Africa | 0.05 (0 to 0.15) | 0.08 (0 to 0.25) | 1.33 (0.06 to 3.86) | 0.15 (0.05 to 0.47) | 0.23 (0.08 to 0.73) | 3.86 (1.31 to 12.19) |

**Abbreviations:** CML, chronic myeloid leukemia; DALY, disability-adjusted life year; GBD, Global Burden of Disease; UI, uncertainty interval.

**Supplementary Table S4.** Age-standardized prevalence, mortality, and DALY rates of CML in individuals aged ≥65 years and their AAPCs in 204 countries and territories, 1990–2021.

| Location | Age-standardized rate in 2021 (per 100,000) | | | AAPCs (1990-2021) (%/year) | | |
| --- | --- | --- | --- | --- | --- | --- |
| **Prevalence** (95% UI) | **Mortality** (95% UI) | **DALYs** (95% UI) | **Prevalence** (95% CI) | **Mortality** (95% CI) | **DALYs** (95% CI) |
| Afghanistan | 3.39 (1.15 to 7.88) | 5.23 (1.81 to 11.94) | 89.64 (30.67 to 202.39) | -0.27 (-0.39 to -0.16) | -0.4 (-0.5 to -0.31) | -0.51 (-0.58 to -0.43) |
| Albania | 1.5 (0.38 to 3.78) | 1.36 (0.36 to 3.19) | 19.63 (5 to 48.88) | 0.38 (-0.13 to 0.89) | -1.23 (-1.61 to -0.86) | -1.55 (-1.92 to -1.17) |
| Algeria | 1.2 (0.42 to 2.61) | 1.66 (0.61 to 3.49) | 21.9 (7.83 to 46.91) | -0.31 (-0.42 to -0.19) | -1.06 (-1.16 to -0.96) | -1.21 (-1.29 to -1.13) |
| American Samoa | 3.27 (1.6 to 5.29) | 4.44 (2.03 to 7.12) | 73.94 (34.81 to 117.26) | 4.14 (3.19 to 5.1) | 3.82 (2.88 to 4.77) | 3.74 (2.78 to 4.71) |
| Andorra | 8.65 (3.1 to 22.09) | 2.04 (0.75 to 4.84) | 31.1 (11.17 to 75.85) | -0.63 (-1.73 to 0.49) | -3.77 (-4.28 to -3.25) | -3.81 (-4.28 to -3.35) |
| Angola | 0.24 (0.06 to 0.69) | 0.37 (0.09 to 1.08) | 6.28 (1.56 to 18.27) | -0.3 (-0.43 to -0.18) | -0.43 (-0.54 to -0.32) | -0.54 (-0.68 to -0.4) |
| Antigua and Barbuda | 6.06 (4.62 to 7.59) | 6.88 (5.32 to 8.52) | 110.81 (84.62 to 138.3) | -0.56 (-1.69 to 0.59) | -1.11 (-2.12 to -0.1) | -1.32 (-2.44 to -0.18) |
| Argentina | 2.28 (1.5 to 3.33) | 2.61 (1.78 to 3.72) | 39.87 (26.84 to 56.97) | -2.43 (-2.88 to -1.99) | -3.23 (-3.72 to -2.73) | -3.38 (-3.85 to -2.9) |
| Armenia | 1.78 (1.34 to 2.32) | 1.47 (1.15 to 1.87) | 27.16 (21.05 to 35) | -1.17 (-1.72 to -0.61) | -2.42 (-3 to -1.84) | -2.57 (-3.16 to -1.97) |
| Australia | 5.13 (3.17 to 7.64) | 2.54 (1.69 to 3.59) | 35.12 (22.83 to 50.48) | -2.44 (-2.85 to -2.03) | -3.91 (-4.18 to -3.64) | -4.37 (-4.66 to -4.08) |
| Austria | 10.88 (6.91 to 16.16) | 2.58 (1.7 to 3.68) | 39.55 (25.79 to 56.73) | 0.12 (-0.36 to 0.61) | -3.28 (-3.69 to -2.86) | -3.46 (-3.89 to -3.03) |
| Azerbaijan | 1.02 (0.42 to 2.1) | 1.14 (0.49 to 2.34) | 20.87 (8.65 to 43.97) | -0.01 (-0.21 to 0.18) | -0.63 (-0.89 to -0.37) | -0.74 (-0.97 to -0.52) |
| Bahamas | 2.14 (1.59 to 2.85) | 2.64 (1.97 to 3.47) | 44.83 (33.39 to 59.35) | -0.56 (-1.54 to 0.44) | -1.04 (-1.92 to -0.16) | -1.2 (-1.99 to -0.39) |
| Bahrain | 3.55 (1.34 to 8.67) | 3.65 (1.46 to 8.37) | 51.64 (19.94 to 121.62) | -1.33 (-2.12 to -0.54) | -2.58 (-3.57 to -1.58) | -3.01 (-3.81 to -2.2) |
| Bangladesh | 1.42 (0.53 to 2.98) | 2.2 (0.85 to 4.45) | 32.23 (11.72 to 68.33) | -1.22 (-1.76 to -0.66) | -1.35 (-1.98 to -0.71) | -1.74 (-2.29 to -1.19) |
| Barbados | 3.11 (2.16 to 4.26) | 3.54 (2.51 to 4.74) | 56.02 (39.34 to 75.5) | 0.43 (-0.52 to 1.39) | -0.18 (-1.17 to 0.82) | -0.29 (-1.23 to 0.66) |
| Belarus | 3.73 (2.25 to 5.85) | 2.18 (1.35 to 3.35) | 39.02 (24.01 to 60.33) | 1.68 (0.85 to 2.52) | -0.27 (-1.31 to 0.79) | -0.5 (-1.23 to 0.23) |
| Belgium | 8.27 (5.01 to 12.87) | 2.14 (1.37 to 3.15) | 32.35 (20.35 to 48.37) | -0.7 (-2.1 to 0.71) | -3.92 (-5.18 to -2.64) | -3.85 (-4.67 to -3.02) |
| Belize | 1.27 (0.97 to 1.64) | 1.65 (1.27 to 2.12) | 27.8 (21.35 to 35.9) | -0.06 (-0.61 to 0.5) | -0.42 (-0.98 to 0.14) | -0.49 (-1.05 to 0.07) |
| Benin | 0.11 (0.03 to 0.33) | 0.18 (0.05 to 0.52) | 2.94 (0.74 to 8.61) | -0.02 (-0.15 to 0.1) | -0.16 (-0.28 to -0.04) | -0.24 (-0.36 to -0.12) |
| Bermuda | 3.7 (2.4 to 5.53) | 1.89 (1.26 to 2.73) | 31.14 (20.66 to 45.2) | -0.12 (-0.71 to 0.47) | -2.93 (-4.59 to -1.25) | -3.09 (-4.71 to -1.44) |
| Bhutan | 1.48 (0.58 to 3.18) | 2.31 (0.93 to 4.77) | 34.31 (13.13 to 73.02) | -0.61 (-0.69 to -0.53) | -0.81 (-0.92 to -0.7) | -1.07 (-1.19 to -0.96) |
| Bolivia (Plurinational State of Bolivia) | 2.58 (1.1 to 5.08) | 3.8 (1.64 to 7.4) | 62.6 (26.29 to 123.83) | -0.72 (-0.79 to -0.65) | -1 (-1.08 to -0.92) | -1.12 (-1.18 to -1.06) |
| Bosnia and Herzegovina | 2.24 (0.59 to 4.97) | 1.7 (0.43 to 3.68) | 27.38 (7.05 to 60.19) | 1.47 (1.16 to 1.78) | -0.12 (-0.47 to 0.24) | -0.42 (-0.77 to -0.07) |
| Botswana | 0.11 (0.02 to 0.33) | 0.19 (0.04 to 0.56) | 2.75 (0.6 to 8.35) | -1.1 (-1.97 to -0.22) | -1.14 (-1.93 to -0.35) | -1.31 (-2.16 to -0.45) |
| Brazil | 1.79 (1.48 to 2.1) | 2.27 (1.88 to 2.65) | 35.27 (29.55 to 41.26) | -1.42 (-1.59 to -1.25) | -1.98 (-2.15 to -1.8) | -2.19 (-2.37 to -2.01) |
| Brunei Darussalam | 0.74 (0.18 to 1.72) | 0.89 (0.22 to 2.08) | 14.4 (3.54 to 34.03) | -2.36 (-3.32 to -1.39) | -2.95 (-4.07 to -1.81) | -3.27 (-4.41 to -2.12) |
| Bulgaria | 1.5 (0.9 to 2.33) | 1.42 (0.88 to 2.12) | 22.58 (13.64 to 34.39) | -1.38 (-2.76 to 0.02) | -2.53 (-3.83 to -1.2) | -2.59 (-3.8 to -1.37) |
| Burkina Faso | 0.16 (0.04 to 0.51) | 0.26 (0.07 to 0.84) | 4.27 (1.07 to 13.7) | -0.01 (-0.25 to 0.23) | -0.11 (-0.37 to 0.16) | -0.15 (-0.48 to 0.18) |
| Burundi | 0.5 (0.14 to 1.37) | 0.79 (0.22 to 2.15) | 13.38 (3.71 to 36.89) | -1.02 (-1.11 to -0.93) | -1.12 (-1.25 to -0.98) | -1.22 (-1.36 to -1.08) |
| Cabo Verde | 0.35 (0.08 to 1.18) | 0.47 (0.11 to 1.58) | 7.41 (1.66 to 25.04) | 1.3 (1.16 to 1.44) | 0.78 (0.47 to 1.1) | 0.63 (0.45 to 0.8) |
| Cambodia | 3.12 (1.33 to 5.98) | 4.64 (1.96 to 8.81) | 77.08 (32.52 to 147.61) | -0.43 (-0.53 to -0.33) | -0.68 (-0.77 to -0.58) | -0.84 (-0.94 to -0.73) |
| Cameroon | 0.14 (0.04 to 0.36) | 0.21 (0.06 to 0.56) | 3.54 (1 to 9.34) | 0.04 (-0.09 to 0.16) | -0.14 (-0.25 to -0.03) | -0.17 (-0.3 to -0.05) |
| Canada | 7.45 (4.87 to 10.7) | 1.96 (1.35 to 2.72) | 29.53 (20.08 to 41.41) | -1.82 (-2.46 to -1.17) | -3.98 (-4.4 to -3.55) | -4.25 (-4.68 to -3.82) |
| Central African Republic | 0.28 (0.07 to 0.75) | 0.45 (0.12 to 1.22) | 7.83 (2.05 to 20.86) | -0.79 (-0.85 to -0.74) | -0.86 (-0.97 to -0.74) | -0.88 (-0.98 to -0.78) |
| Chad | 0.14 (0.04 to 0.42) | 0.22 (0.06 to 0.68) | 3.74 (0.97 to 11.35) | 0.58 (0.41 to 0.76) | 0.47 (0.3 to 0.63) | 0.49 (0.35 to 0.63) |
| Chile | 3.33 (2.19 to 4.83) | 2.5 (1.69 to 3.53) | 38.04 (25.3 to 54.14) | -0.7 (-1.3 to -0.1) | -2.66 (-3.32 to -2) | -2.82 (-3.48 to -2.14) |
| China | 0.96 (0.49 to 1.55) | 0.47 (0.26 to 0.83) | 7.91 (4.4 to 14.04) | 0.36 (0.04 to 0.69) | -3.1 (-3.51 to -2.69) | -3.2 (-3.56 to -2.83) |
| Colombia | 2.31 (1.53 to 3.38) | 2.34 (1.55 to 3.37) | 37.71 (24.72 to 54.8) | -0.89 (-1.38 to -0.4) | -2 (-2.41 to -1.59) | -2.23 (-2.66 to -1.79) |
| Comoros | 0.39 (0.11 to 1.12) | 0.59 (0.17 to 1.68) | 9.96 (2.82 to 29.03) | -0.71 (-0.8 to -0.61) | -0.83 (-0.92 to -0.75) | -0.93 (-1.05 to -0.81) |
| Congo | 0.23 (0.07 to 0.61) | 0.36 (0.11 to 0.91) | 5.98 (1.79 to 15.13) | -0.88 (-1.05 to -0.71) | -1.08 (-1.24 to -0.92) | -1.16 (-1.4 to -0.93) |
| Cook Islands | 1.18 (0.5 to 2.04) | 1.03 (0.46 to 1.82) | 17.15 (7.61 to 29.74) | -0.68 (-0.96 to -0.41) | -2.12 (-2.5 to -1.75) | -2.22 (-2.53 to -1.91) |
| Costa Rica | 4.07 (2.64 to 5.91) | 3.65 (2.42 to 5.22) | 58.87 (38.72 to 85.37) | -1.18 (-1.62 to -0.74) | -2.2 (-2.7 to -1.7) | -2.41 (-2.89 to -1.93) |
| Coted'Ivoire | 0.08 (0.02 to 0.24) | 0.13 (0.03 to 0.37) | 2.15 (0.54 to 5.95) | -0.48 (-0.75 to -0.21) | -0.67 (-0.78 to -0.55) | -0.65 (-0.78 to -0.52) |
| Croatia | 4.75 (2.48 to 8.11) | 1.98 (1.1 to 3.25) | 31.65 (17.23 to 52.81) | -1.05 (-1.93 to -0.15) | -3.85 (-4.74 to -2.95) | -3.91 (-4.75 to -3.06) |
| Cuba | 6.37 (4.71 to 8.26) | 5.31 (4.04 to 6.81) | 87.95 (66.93 to 112.49) | 0.25 (-0.68 to 1.19) | -1.15 (-2.12 to -0.17) | -1.08 (-2.18 to 0.04) |
| Cyprus | 5.84 (2.44 to 11.82) | 1.77 (0.73 to 3.49) | 24.55 (10.18 to 48.26) | 1.36 (0.64 to 2.09) | -2.91 (-3.65 to -2.16) | -3.02 (-3.25 to -2.78) |
| Czechia | 4.22 (2.68 to 6.42) | 1.78 (1.17 to 2.68) | 28.88 (19.06 to 43.57) | 0.98 (0.2 to 1.76) | -2.11 (-2.85 to -1.37) | -2.25 (-2.94 to -1.56) |
| Democratic People's Republic of Korea | 0.62 (0.24 to 1.37) | 0.72 (0.29 to 1.58) | 13.19 (5.1 to 29.01) | -1.07 (-1.23 to -0.9) | -1.73 (-1.8 to -1.66) | -1.66 (-1.76 to -1.56) |
| Democratic Republic of the Congo | 0.22 (0.05 to 0.59) | 0.34 (0.08 to 0.95) | 5.81 (1.35 to 15.87) | -0.39 (-0.48 to -0.3) | -0.52 (-0.68 to -0.37) | -0.54 (-0.61 to -0.47) |
| Denmark | 12.68 (7.63 to 18.94) | 3.2 (2.05 to 4.72) | 48.52 (30.52 to 72.6) | 1.42 (0.82 to 2.02) | -1.8 (-2.27 to -1.32) | -1.98 (-2.47 to -1.48) |
| Djibouti | 0.43 (0.12 to 1.22) | 0.66 (0.18 to 1.82) | 11.17 (3.01 to 31.32) | -0.13 (-0.18 to -0.07) | -0.28 (-0.33 to -0.23) | -0.34 (-0.39 to -0.28) |
| Dominica | 3.34 (1.09 to 6.7) | 4.38 (1.39 to 8.66) | 79.18 (25.16 to 157.44) | -0.49 (-0.87 to -0.1) | -0.8 (-1.1 to -0.5) | -0.71 (-0.98 to -0.45) |
| Dominican Republic | 0.91 (0.35 to 1.92) | 1.28 (0.48 to 2.58) | 20.58 (7.7 to 42.29) | -0.22 (-1.15 to 0.73) | -0.7 (-1.58 to 0.18) | -0.56 (-1.62 to 0.5) |
| Ecuador | 1.95 (1.21 to 2.92) | 2.55 (1.63 to 3.73) | 39.71 (24.83 to 58.9) | 0.42 (-0.48 to 1.33) | -0.12 (-1.01 to 0.77) | -0.33 (-1.22 to 0.56) |
| Egypt | 2.8 (0.92 to 7.62) | 3.56 (1.16 to 10.1) | 59.13 (19.33 to 161.34) | 1.47 (1.14 to 1.81) | 0.64 (0.23 to 1.04) | 0.71 (0.39 to 1.03) |
| El Salvador | 0.93 (0.42 to 1.57) | 1.05 (0.45 to 1.74) | 17.79 (7.74 to 29.69) | 0.32 (-0.67 to 1.33) | -0.7 (-1.85 to 0.46) | -0.67 (-1.81 to 0.48) |
| Equatorial Guinea | 0.2 (0.05 to 0.58) | 0.29 (0.08 to 0.8) | 4.8 (1.28 to 13.45) | -1.07 (-1.27 to -0.87) | -1.48 (-1.7 to -1.27) | -1.67 (-1.89 to -1.45) |
| Eritrea | 0.51 (0.15 to 1.35) | 0.8 (0.23 to 2.08) | 13.67 (3.96 to 36.55) | -0.03 (-0.1 to 0.04) | -0.13 (-0.17 to -0.1) | -0.33 (-0.43 to -0.24) |
| Estonia | 4.57 (2.79 to 7.23) | 2.16 (1.34 to 3.31) | 37.61 (23.06 to 58.08) | -0.63 (-1.78 to 0.54) | -3.37 (-4.72 to -2) | -3.46 (-4.84 to -2.06) |
| Eswatini | 0.16 (0.05 to 0.39) | 0.27 (0.08 to 0.66) | 4.14 (1.2 to 10.06) | -0.26 (-0.42 to -0.09) | -0.33 (-0.63 to -0.03) | -0.34 (-0.5 to -0.17) |
| Ethiopia | 0.8 (0.24 to 2.26) | 1.23 (0.37 to 3.36) | 20.58 (6.17 to 57.43) | -1.8 (-1.92 to -1.68) | -2 (-2.1 to -1.9) | -2.21 (-2.31 to -2.11) |
| Fiji | 1.52 (0.59 to 2.97) | 2.14 (0.82 to 4.22) | 37.49 (14.88 to 73.26) | -1.55 (-1.72 to -1.38) | -1.56 (-1.79 to -1.34) | -1.85 (-2.02 to -1.68) |
| Finland | 5.06 (3.01 to 7.82) | 1.66 (1.03 to 2.5) | 25.49 (15.68 to 38.37) | 0.39 (-0.48 to 1.26) | -2.89 (-3.41 to -2.36) | -2.99 (-3.6 to -2.38) |
| France | 11.05 (6.48 to 17.17) | 2.87 (1.82 to 4.23) | 41.57 (25.53 to 62.17) | 0.4 (0.03 to 0.78) | -3.13 (-3.29 to -2.96) | -3.46 (-3.66 to -3.25) |
| Gabon | 0.23 (0.06 to 0.58) | 0.34 (0.1 to 0.87) | 5.53 (1.6 to 13.89) | -1 (-1.08 to -0.91) | -1.28 (-1.43 to -1.12) | -1.36 (-1.5 to -1.22) |
| Gambia | 0.06 (0.02 to 0.18) | 0.09 (0.03 to 0.28) | 1.57 (0.42 to 4.67) | -0.11 (-0.32 to 0.1) | -0.29 (-0.49 to -0.1) | -0.26 (-0.5 to -0.03) |
| Georgia | 1.32 (0.86 to 1.91) | 1.36 (0.9 to 1.94) | 24.78 (16.22 to 35.5) | 0.15 (-1.23 to 1.55) | -0.36 (-1.31 to 0.6) | -0.53 (-1.43 to 0.38) |
| Germany | 12.59 (8.1 to 18.13) | 3.27 (2.18 to 4.55) | 49.49 (32.75 to 69.49) | 0.01 (-0.81 to 0.84) | -3.54 (-4.05 to -3.02) | -3.76 (-4.2 to -3.33) |
| Ghana | 0.11 (0.03 to 0.38) | 0.17 (0.04 to 0.56) | 2.78 (0.68 to 9.24) | -2.16 (-2.45 to -1.88) | -2.32 (-2.62 to -2.02) | -2.36 (-2.66 to -2.06) |
| Greece | 10.77 (8.1 to 13.93) | 3.43 (2.67 to 4.26) | 50.59 (39.6 to 62.86) | -1.26 (-1.68 to -0.83) | -3.25 (-3.74 to -2.75) | -3.44 (-3.97 to -2.9) |
| Greenland | 1.21 (0.19 to 2.75) | 1.37 (0.19 to 3.11) | 21.78 (3.2 to 50.31) | -0.84 (-1.22 to -0.45) | -1.69 (-2.18 to -1.19) | -1.7 (-2.18 to -1.22) |
| Grenada | 2.52 (1.93 to 3.25) | 3.18 (2.42 to 4.1) | 55.43 (42.26 to 71.42) | 0.07 (-0.94 to 1.1) | -0.44 (-1.45 to 0.58) | -0.4 (-1.61 to 0.82) |
| Guam | 2.66 (1.84 to 4.08) | 2.41 (1.66 to 3.69) | 47.08 (33.34 to 71.75) | -2.82 (-3.75 to -1.89) | -3.88 (-4.42 to -3.34) | -3.54 (-4.35 to -2.71) |
| Guatemala | 0.74 (0.56 to 0.96) | 1.04 (0.78 to 1.34) | 17.27 (12.98 to 22.36) | -1.68 (-2.68 to -0.66) | -2.17 (-3.37 to -0.96) | -2.12 (-3.14 to -1.09) |
| Guinea | 0.03 (0.01 to 0.1) | 0.05 (0.01 to 0.15) | 0.89 (0.22 to 2.64) | -0.62 (-0.7 to -0.54) | -0.74 (-0.81 to -0.67) | -0.76 (-0.86 to -0.67) |
| Guinea-Bissau | 0.18 (0.05 to 0.47) | 0.28 (0.09 to 0.74) | 4.8 (1.43 to 12.55) | 0.4 (0.32 to 0.49) | 0.29 (0.2 to 0.39) | 0.25 (0.16 to 0.35) |
| Guyana | 2.58 (1.59 to 3.86) | 3.8 (2.36 to 5.63) | 65.44 (40.01 to 97.81) | -1.18 (-1.58 to -0.78) | -1.5 (-1.89 to -1.11) | -1.59 (-2 to -1.18) |
| Haiti | 3.12 (1.31 to 5.91) | 4.94 (2.08 to 9.33) | 84.24 (35.18 to 158.61) | -0.88 (-0.93 to -0.82) | -0.96 (-1.05 to -0.88) | -1.02 (-1.1 to -0.94) |
| Honduras | 2.34 (1.02 to 4.64) | 3.42 (1.51 to 6.71) | 57.41 (25.03 to 113.19) | 0.82 (0.5 to 1.15) | 0.69 (0.32 to 1.07) | 0.62 (0.26 to 0.98) |
| Hungary | 4.54 (3.14 to 6.48) | 2.51 (1.8 to 3.44) | 42.08 (30.13 to 58.23) | -0.44 (-0.93 to 0.06) | -2.8 (-3.04 to -2.57) | -2.97 (-3.19 to -2.75) |
| Iceland | 6.68 (4.12 to 10.4) | 1.34 (0.85 to 2.02) | 20.22 (12.76 to 30.73) | -0.63 (-1.52 to 0.27) | -3.54 (-3.92 to -3.15) | -3.75 (-4.16 to -3.34) |
| India | 1.57 (0.85 to 2.49) | 2.35 (1.27 to 3.65) | 36.92 (19.94 to 58.24) | -0.31 (-0.93 to 0.32) | -0.72 (-1.46 to 0.02) | -0.77 (-1.42 to -0.12) |
| Indonesia | 1.46 (0.63 to 2.48) | 2.15 (0.93 to 3.61) | 34.75 (14.95 to 59.04) | -0.59 (-0.65 to -0.52) | -0.79 (-0.88 to -0.71) | -0.99 (-1.07 to -0.9) |
| Iran (Islamic Republic of) | 3.39 (0.85 to 5.01) | 3.32 (0.89 to 4.8) | 52.46 (13.47 to 76.21) | -0.17 (-0.33 to -0.02) | -1.53 (-1.62 to -1.44) | -1.65 (-1.77 to -1.54) |
| Iraq | 14.06 (6.12 to 22.26) | 15.8 (7.06 to 24.87) | 256.57 (111.48 to 405.62) | 1.28 (0.96 to 1.61) | 0.43 (0.01 to 0.84) | 0.24 (-0.14 to 0.62) |
| Ireland | 6.69 (4.63 to 9.57) | 1.39 (0.96 to 1.95) | 21.33 (15.09 to 29.52) | -1.26 (-1.94 to -0.57) | -5.40 (-5.9 to -4.91) | -5.46 (-6.2 to -4.72) |
| Israel | 6.27 (3.81 to 9.85) | 2.06 (1.31 to 3.09) | 30.72 (19.33 to 46.82) | -0.69 (-1.49 to 0.12) | -3.84 (-4.55 to -3.12) | -4.05 (-4.65 to -3.44) |
| Italy | 11.36 (8.82 to 14.37) | 2.72 (2.15 to 3.31) | 39.77 (31.75 to 48.65) | -0.56 (-0.96 to -0.16) | -3.4 (-3.69 to -3.1) | -3.85 (-4.13 to -3.57) |
| Jamaica | 1.63 (0.92 to 2.68) | 1.94 (1.11 to 3.13) | 31.91 (17.9 to 52.11) | 0.93 (0.45 to 1.41) | 0.42 (-0.14 to 0.97) | 0.41 (-0.08 to 0.91) |
| Japan | 3.25 (2.59 to 3.91) | 1.13 (0.91 to 1.3) | 16.12 (13.38 to 18.33) | -1.69 (-2 to -1.38) | -3.71 (-4.11 to -3.3) | -4.1 (-4.49 to -3.71) |
| Jordan | 2.65 (1.11 to 5.44) | 2.61 (1.13 to 5.09) | 38.36 (16.36 to 76.44) | -1.98 (-2.64 to -1.32) | -3.32 (-3.95 to -2.69) | -3.57 (-4.11 to -3.03) |
| Kazakhstan | 1.12 (0.74 to 1.69) | 1.09 (0.74 to 1.64) | 19.54 (12.87 to 29.77) | -0.59 (-1.64 to 0.48) | -1.47 (-2.23 to -0.7) | -1.73 (-2.48 to -0.97) |
| Kenya | 0.48 (0.22 to 1) | 0.74 (0.35 to 1.51) | 12.26 (5.75 to 25.45) | 0.08 (-0.05 to 0.21) | -0.03 (-0.16 to 0.11) | -0.06 (-0.18 to 0.06) |
| Kiribati | 2.98 (1.8 to 5.07) | 4.66 (2.78 to 8.01) | 81.03 (49.14 to 136.29) | 0.34 (0.31 to 0.38) | 0.31 (0.29 to 0.33) | 0.2 (0.16 to 0.23) |
| Kuwait | 2.12 (1.2 to 3.51) | 1.34 (0.78 to 2.11) | 19.82 (11.28 to 31.94) | 0.27 (-1.39 to 1.96) | -1.51 (-3 to 0) | -1.93 (-3.46 to -0.39) |
| Kyrgyzstan | 0.78 (0.56 to 1.05) | 0.81 (0.59 to 1.08) | 15.51 (11.26 to 20.66) | -1.02 (-2.54 to 0.53) | -1.63 (-3.43 to 0.2) | -1.73 (-3.52 to 0.09) |
| Lao People's Democratic Republic | 2.18 (0.91 to 4.28) | 3.37 (1.38 to 6.76) | 55.92 (22.7 to 114.06) | -1.75 (-1.86 to -1.63) | -1.92 (-2.02 to -1.82) | -2.1 (-2.19 to -2.01) |
| Latvia | 3.21 (1.91 to 5.04) | 2.16 (1.32 to 3.31) | 38.27 (23.22 to 59.2) | -0.79 (-1.76 to 0.2) | -2.65 (-3.76 to -1.53) | -2.48 (-3.5 to -1.45) |
| Lebanon | 4.2 (1.37 to 8.64) | 3.59 (1.16 to 7.33) | 52.75 (16.99 to 108.48) | 0.15 (-0.09 to 0.39) | -1.6 (-1.81 to -1.39) | -1.84 (-2.05 to -1.63) |
| Lesotho | 0.17 (0.05 to 0.4) | 0.29 (0.08 to 0.68) | 4.61 (1.23 to 10.69) | 0.98 (0.73 to 1.23) | 1 (0.64 to 1.37) | 1.06 (0.8 to 1.33) |
| Liberia | 0.14 (0.04 to 0.36) | 0.2 (0.06 to 0.52) | 3.41 (0.97 to 9.02) | 0.27 (-0.1 to 0.64) | -0.03 (-0.36 to 0.3) | -0.05 (-0.39 to 0.29) |
| Libya | 2.44 (0.83 to 6.43) | 2.76 (0.98 to 7.35) | 44.85 (15.68 to 117.14) | -0.12 (-0.71 to 0.47) | -0.72 (-1.21 to -0.23) | -0.8 (-1.16 to -0.44) |
| Lithuania | 3.74 (2.22 to 5.83) | 2.69 (1.69 to 4.07) | 46.26 (28.51 to 70.91) | -1.16 (-1.89 to -0.44) | -2.57 (-3.24 to -1.9) | -2.7 (-3.38 to -2) |
| Luxembourg | 9.18 (6.82 to 12.38) | 2.19 (1.68 to 2.83) | 33.78 (26.07 to 43.74) | -0.31 (-1.4 to 0.79) | -4.3 (-4.73 to -3.87) | -4.48 (-4.96 to -4) |
| Madagascar | 0.3 (0.1 to 0.69) | 0.46 (0.15 to 1.06) | 7.93 (2.53 to 18.33) | -1.08 (-1.22 to -0.93) | -1.19 (-1.33 to -1.04) | -1.22 (-1.37 to -1.07) |
| Malawi | 0.13 (0.04 to 0.31) | 0.2 (0.07 to 0.46) | 3.47 (1.18 to 8.05) | -0.61 (-0.76 to -0.46) | -0.82 (-0.94 to -0.7) | -0.81 (-0.89 to -0.73) |
| Malaysia | 0.96 (0.39 to 2.2) | 1.21 (0.49 to 2.64) | 18.89 (7.61 to 42.68) | -0.81 (-1.1 to -0.52) | -1.41 (-1.72 to -1.09) | -1.68 (-1.97 to -1.38) |
| Maldives | 0.86 (0.31 to 1.82) | 0.88 (0.33 to 1.78) | 13.69 (4.99 to 28.24) | -0.63 (-1.09 to -0.18) | -1.86 (-2.22 to -1.51) | -2.38 (-2.77 to -1.99) |
| Mali | 0.09 (0.02 to 0.3) | 0.14 (0.03 to 0.45) | 2.41 (0.51 to 8) | -0.89 (-0.98 to -0.8) | -1.02 (-1.11 to -0.93) | -1.03 (-1.12 to -0.93) |
| Malta | 6.83 (3.96 to 10.79) | 1.84 (1.15 to 2.77) | 28 (17.16 to 42.92) | -1.34 (-2.18 to -0.49) | -4.79 (-5.04 to -4.54) | -4.95 (-5.22 to -4.68) |
| Marshall Islands | 2.95 (1.58 to 4.88) | 4.42 (2.36 to 7.34) | 77.96 (42.23 to 128.94) | -0.69 (-0.76 to -0.63) | -0.88 (-0.95 to -0.82) | -0.82 (-0.9 to -0.73) |
| Mauritania | 0.09 (0.02 to 0.28) | 0.13 (0.04 to 0.38) | 2.24 (0.59 to 6.43) | -0.63 (-0.82 to -0.44) | -1.04 (-1.22 to -0.87) | -1.08 (-1.33 to -0.83) |
| Mauritius | 1.7 (1.3 to 2.16) | 1.9 (1.47 to 2.39) | 31.91 (24.8 to 40.1) | -3.47 (-6.49 to -0.35) | -4.16 (-7.16 to -1.06) | -4.28 (-7.33 to -1.13) |
| Mexico | 1.47 (1.27 to 1.67) | 1.8 (1.57 to 2.04) | 29.21 (25.4 to 33.18) | -0.83 (-1.29 to -0.38) | -1.55 (-1.96 to -1.14) | -1.51 (-1.98 to -1.03) |
| Micronesia (Federated States of) | 4.19 (2.45 to 6.71) | 6.23 (3.58 to 10.14) | 107.18 (62.54 to 173.14) | -0.24 (-0.32 to -0.17) | -0.43 (-0.5 to -0.37) | -0.52 (-0.55 to -0.49) |
| Monaco | 15.97 (5.7 to 35.49) | 3.8 (1.4 to 8.26) | 57.21 (20.89 to 126.58) | 1.53 (1.31 to 1.75) | -0.91 (-1.05 to -0.77) | -1.05 (-1.19 to -0.92) |
| Mongolia | 0.59 (0.25 to 1.12) | 0.75 (0.32 to 1.38) | 13.85 (5.84 to 25.59) | -0.09 (-0.45 to 0.27) | -0.6 (-0.94 to -0.26) | -0.75 (-1.1 to -0.4) |
| Montenegro | 2.65 (0.84 to 5.38) | 1.61 (0.52 to 3.19) | 24.89 (8.03 to 50.06) | 0.42 (-0.05 to 0.89) | -0.76 (-1.31 to -0.21) | -1.03 (-1.6 to -0.46) |
| Morocco | 0.49 (0.18 to 1.23) | 0.67 (0.26 to 1.66) | 10.69 (4.01 to 26.25) | -0.3 (-0.49 to -0.11) | -0.69 (-0.94 to -0.43) | -0.82 (-1.05 to -0.58) |
| Mozambique | 0.64 (0.23 to 1.51) | 1.03 (0.38 to 2.39) | 17.44 (6.23 to 41.36) | -0.57 (-0.74 to -0.4) | -0.69 (-0.86 to -0.52) | -0.65 (-0.8 to -0.5) |
| Myanmar | 1.85 (0.76 to 3.65) | 2.72 (1.11 to 5.46) | 44.67 (18.07 to 89.79) | -1.82 (-1.9 to -1.74) | -2.1 (-2.18 to -2.03) | -2.28 (-2.36 to -2.2) |
| Namibia | 0.09 (0.03 to 0.23) | 0.14 (0.04 to 0.35) | 2.15 (0.61 to 5.37) | -0.22 (-0.39 to -0.06) | -0.45 (-0.66 to -0.23) | -0.56 (-0.74 to -0.38) |
| Nauru | 4.9 (2.62 to 8.15) | 7.03 (3.72 to 11.68) | 126.52 (68.22 to 207.67) | 0.69 (0.62 to 0.76) | 0.57 (0.53 to 0.62) | 0.4 (0.36 to 0.44) |
| Nepal | 1.87 (0.81 to 3.79) | 3 (1.33 to 5.95) | 45.18 (19.32 to 92.18) | -0.26 (-0.39 to -0.13) | -0.43 (-0.53 to -0.34) | -0.64 (-0.76 to -0.51) |
| Netherlands | 8.35 (5.36 to 12.2) | 1.84 (1.26 to 2.57) | 27.04 (18.34 to 38.06) | -0.91 (-1.13 to -0.69) | -3.73 (-3.97 to -3.49) | -4.01 (-4.22 to -3.8) |
| New Zealand | 6.78 (4.3 to 10.42) | 1.45 (0.97 to 2.09) | 21.38 (14.01 to 31.39) | -2.97 (-4.21 to -1.72) | -4.73 (-5.84 to -3.62) | -5.01 (-6.07 to -3.94) |
| Nicaragua | 1.6 (0.91 to 2.68) | 1.91 (1.08 to 3.06) | 32.19 (18.33 to 51.29) | -0.16 (-0.36 to 0.04) | -0.86 (-1.05 to -0.67) | -0.89 (-1.09 to -0.7) |
| Niger | 0.12 (0.02 to 0.42) | 0.19 (0.04 to 0.63) | 3.23 (0.66 to 10.63) | 0.3 (0.15 to 0.46) | 0.12 (-0.03 to 0.27) | 0.16 (0.04 to 0.27) |
| Nigeria | 0.09 (0.03 to 0.24) | 0.14 (0.05 to 0.37) | 2.27 (0.84 to 6.05) | -0.76 (-0.89 to -0.63) | -0.95 (-1.15 to -0.75) | -0.97 (-1.12 to -0.82) |
| Niue | 3.51 (1.95 to 5.6) | 4.49 (2.48 to 7.27) | 75.82 (42.46 to 120.71) | -0.19 (-0.29 to -0.09) | -0.69 (-0.77 to -0.61) | -0.67 (-0.74 to -0.6) |
| North Macedonia | 0 (0 to 0) | 0 (0 to 0) | 0 (0 to 0.03) | 0.49 (0.15 to 0.83) | -0.88 (-1.29 to -0.46) | -1.22 (-1.62 to -0.81) |
| Northern Mariana Islands | 3.16 (1.85 to 5.11) | 3.67 (2.21 to 5.81) | 58.88 (34.76 to 93.56) | -0.87 (-1.99 to 0.26) | -1.24 (-1.74 to -0.75) | -1.39 (-2.5 to -0.26) |
| Norway | 5.65 (4.38 to 7.31) | 1.17 (0.93 to 1.43) | 17.93 (14.3 to 22.22) | 0.1 (-1.03 to 1.24) | -3.68 (-4.53 to -2.83) | -3.82 (-4.69 to -2.93) |
| Oman | 1.22 (0.24 to 5.43) | 1.08 (0.23 to 4.68) | 17.25 (3.54 to 75.49) | -0.73 (-1.61 to 0.16) | -2.15 (-2.66 to -1.64) | -2.57 (-3.45 to -1.69) |
| Pakistan | 1.73 (0.87 to 3.06) | 2.83 (1.42 to 4.95) | 43.8 (21.8 to 77.85) | -0.54 (-0.62 to -0.46) | -0.61 (-0.71 to -0.52) | -0.7 (-0.77 to -0.63) |
| Palau | 2.64 (1.38 to 4.53) | 3.63 (1.96 to 6.23) | 57.55 (30.7 to 100.19) | -0.25 (-0.46 to -0.05) | -0.59 (-0.68 to -0.5) | -0.68 (-0.87 to -0.48) |
| Palestine | 2.45 (1.08 to 4.85) | 2.99 (1.32 to 5.89) | 45.46 (20 to 91.07) | -1.05 (-1.42 to -0.68) | -1.9 (-2.17 to -1.62) | -1.99 (-2.3 to -1.68) |
| Panama | 1.99 (1.41 to 2.68) | 2.06 (1.44 to 2.76) | 33.51 (23.57 to 44.95) | -0.58 (-0.99 to -0.16) | -1.49 (-1.91 to -1.06) | -1.61 (-2.02 to -1.19) |
| Papua New Guinea | 2.33 (1.2 to 4.19) | 3.37 (1.74 to 6.09) | 60.94 (31.9 to 109.29) | -0.58 (-0.72 to -0.44) | -0.68 (-0.74 to -0.62) | -0.77 (-0.82 to -0.72) |
| Paraguay | 2.91 (1.52 to 5.04) | 3.69 (1.91 to 6.2) | 59.4 (30.81 to 99.95) | -0.13 (-0.36 to 0.1) | -0.76 (-1.17 to -0.35) | -0.69 (-0.88 to -0.49) |
| Peru | 1.93 (0.85 to 3.53) | 2.03 (0.9 to 3.73) | 33.04 (14.49 to 61.85) | 1.01 (-0.06 to 2.08) | -0.22 (-1.33 to 0.9) | -0.28 (-1.39 to 0.85) |
| Philippines | 1.96 (1.18 to 3.4) | 2.79 (1.67 to 4.85) | 47.06 (28.28 to 81.58) | -0.72 (-0.94 to -0.5) | -1.11 (-1.37 to -0.85) | -0.94 (-1.18 to -0.69) |
| Poland | 3.23 (2.66 to 3.88) | 2.1 (1.79 to 2.4) | 33.66 (28.97 to 38.62) | -2.28 (-2.69 to -1.86) | -4.5 (-5 to -4) | -4.63 (-5.04 to -4.22) |
| Portugal | 6.6 (4.1 to 10.2) | 2.02 (1.3 to 2.99) | 30.16 (19.12 to 45.23) | 0.07 (-0.92 to 1.06) | -4.05 (-4.51 to -3.58) | -4.21 (-4.64 to -3.78) |
| Puerto Rico | 3.59 (2.21 to 5.43) | 2.48 (1.57 to 3.68) | 39.28 (24.42 to 59.14) | -0.78 (-1.47 to -0.08) | -2.79 (-3.31 to -2.27) | -2.77 (-3.27 to -2.26) |
| Qatar | 3.42 (1.21 to 8.92) | 2.15 (0.8 to 5.37) | 32.84 (11.81 to 84.5) | -0.54 (-1.83 to 0.77) | -3.33 (-5.31 to -1.3) | -3.29 (-5.03 to -1.51) |
| Republic of Korea | 2.6 (1.03 to 5.32) | 0.97 (0.43 to 1.85) | 13.75 (5.84 to 27.16) | 0.16 (-0.79 to 1.11) | -3.75 (-3.97 to -3.53) | -4.16 (-4.4 to -3.93) |
| Republic of Moldova | 0.96 (0.73 to 1.24) | 0.79 (0.6 to 1) | 14.81 (11.38 to 18.88) | -1.23 (-2.61 to 0.16) | -2.67 (-3.74 to -1.58) | -2.57 (-3.78 to -1.34) |
| Romania | 1.45 (1.07 to 1.93) | 1.05 (0.79 to 1.36) | 17.82 (13.34 to 23.18) | 0 (-0.46 to 0.46) | -2.02 (-2.39 to -1.64) | -2.18 (-2.6 to -1.76) |
| Russian Federation | 3.05 (2.6 to 3.58) | 2.01 (1.73 to 2.33) | 34.98 (30.02 to 40.67) | 1.47 (0.68 to 2.26) | -0.31 (-1.08 to 0.47) | -0.58 (-1.4 to 0.24) |
| Rwanda | 0.53 (0.15 to 1.44) | 0.82 (0.24 to 2.22) | 13.72 (3.8 to 37.89) | -1.24 (-1.5 to -0.98) | -1.37 (-1.46 to -1.28) | -1.5 (-1.59 to -1.4) |
| Saint Kitts and Nevis | 2.77 (1.92 to 3.78) | 3.59 (2.53 to 4.84) | 59.39 (40.98 to 81.19) | -1.05 (-2.17 to 0.08) | -1.71 (-2.81 to -0.59) | -1.71 (-2.85 to -0.57) |
| Saint Lucia | 2.08 (1.56 to 2.74) | 2.72 (2.03 to 3.58) | 42.55 (31.81 to 56.12) | -2.72 (-3.37 to -2.07) | -3.34 (-4.25 to -2.42) | -3.33 (-4.07 to -2.58) |
| Saint Vincent and the Grenadines | 2.09 (1.58 to 2.67) | 2.97 (2.24 to 3.78) | 45.79 (34.65 to 58.21) | -1.52 (-2.41 to -0.62) | -1.62 (-2.62 to -0.61) | -1.96 (-2.87 to -1.04) |
| Samoa | 6.77 (3.41 to 11.02) | 8.85 (4.52 to 14.53) | 155.93 (78.95 to 253.83) | 0.16 (0.09 to 0.22) | -0.27 (-0.31 to -0.24) | -0.24 (-0.28 to -0.21) |
| San Marino | 7.16 (2.66 to 16.63) | 1.55 (0.59 to 3.48) | 24.17 (8.96 to 55.75) | -1.58 (-2.02 to -1.13) | -4.24 (-4.64 to -3.84) | -4.2 (-4.58 to -3.81) |
| Sao Tome and Principe | 0.1 (0.02 to 0.34) | 0.14 (0.03 to 0.49) | 2.39 (0.49 to 8.22) | -0.15 (-0.22 to -0.09) | -0.61 (-0.69 to -0.53) | -0.51 (-0.58 to -0.45) |
| Saudi Arabia | 3.44 (1.14 to 11.06) | 3.31 (1.18 to 9.93) | 52.65 (18 to 161.5) | 1.25 (1.15 to 1.34) | -0.39 (-0.54 to -0.24) | -0.37 (-0.52 to -0.22) |
| Senegal | 0.12 (0.03 to 0.34) | 0.18 (0.05 to 0.5) | 2.93 (0.73 to 8.41) | 0.33 (0.04 to 0.62) | 0.1 (-0.11 to 0.3) | 0.06 (-0.15 to 0.28) |
| Serbia | 2.09 (1.14 to 3.66) | 1.33 (0.72 to 2.29) | 21.97 (11.94 to 37.84) | 0.51 (0 to 1.03) | -1.78 (-2.05 to -1.5) | -1.76 (-2.08 to -1.45) |
| Seychelles | 2.35 (0.96 to 4.45) | 3.07 (1.27 to 5.77) | 46.6 (19.13 to 87.64) | -0.56 (-0.92 to -0.19) | -0.97 (-1.29 to -0.65) | -1.25 (-1.62 to -0.88) |
| Sierra Leone | 0.13 (0.03 to 0.36) | 0.2 (0.05 to 0.56) | 3.36 (0.89 to 9.51) | 0.19 (0.02 to 0.37) | 0.01 (-0.14 to 0.15) | 0.05 (-0.08 to 0.18) |
| Singapore | 2.95 (2.14 to 4.01) | 1 (0.75 to 1.28) | 15.39 (11.61 to 19.82) | -1.07 (-1.41 to -0.72) | -4.94 (-5.32 to -4.55) | -5.06 (-5.91 to -4.2) |
| Slovakia | 1.26 (0.51 to 2.73) | 0.77 (0.32 to 1.6) | 12.72 (5.26 to 26.85) | -0.63 (-0.83 to -0.43) | -2.77 (-3.04 to -2.5) | -2.87 (-3.05 to -2.69) |
| Slovenia | 13.55 (8.28 to 20.6) | 3.77 (2.38 to 5.64) | 61 (38.52 to 92.02) | 2.06 (0.96 to 3.17) | -1.58 (-2.41 to -0.73) | -1.77 (-2.6 to -0.93) |
| Solomon Islands | 3.28 (1.82 to 5.43) | 4.92 (2.7 to 8.25) | 87.5 (48.12 to 144.93) | 0.05 (-0.2 to 0.29) | -0.08 (-0.3 to 0.14) | -0.16 (-0.3 to -0.01) |
| Somalia | 0.6 (0.18 to 1.76) | 0.95 (0.28 to 2.71) | 16.94 (5.09 to 47.51) | -0.24 (-0.31 to -0.17) | -0.37 (-0.45 to -0.28) | -0.35 (-0.42 to -0.29) |
| South Africa | 0.12 (0.05 to 0.23) | 0.18 (0.08 to 0.34) | 2.74 (1.17 to 5.28) | -0.45 (-0.8 to -0.11) | -0.83 (-1.2 to -0.46) | -0.67 (-1.01 to -0.33) |
| South Sudan | 0.48 (0.15 to 1.18) | 0.75 (0.23 to 1.79) | 12.91 (3.95 to 31.16) | -0.23 (-0.35 to -0.11) | -0.33 (-0.42 to -0.25) | -0.39 (-0.5 to -0.27) |
| Spain | 7.26 (4.3 to 11.39) | 1.61 (1.03 to 2.35) | 24.05 (15.13 to 35.67) | -0.61 (-1.38 to 0.17) | -4.24 (-4.71 to -3.78) | -4.52 (-4.77 to -4.27) |
| Sri Lanka | 1.66 (0.79 to 3.11) | 1.67 (0.8 to 3.13) | 26.91 (12.54 to 50.86) | 0.21 (-0.63 to 1.06) | -1.21 (-2.08 to -0.34) | -1.18 (-2.03 to -0.33) |
| Sudan | 1.83 (0.71 to 4.28) | 2.61 (1.04 to 6.05) | 42.72 (16.46 to 98.07) | -0.73 (-0.76 to -0.69) | -1.05 (-1.09 to -1.01) | -1.21 (-1.27 to -1.16) |
| Suriname | 1.61 (0.72 to 3) | 2.26 (1.01 to 4.15) | 37.69 (17.01 to 69.79) | -1.23 (-1.69 to -0.77) | -1.45 (-1.99 to -0.92) | -1.55 (-2.02 to -1.07) |
| Sweden | 6.59 (4.26 to 9.61) | 1.4 (0.95 to 1.98) | 21.38 (14.45 to 30.45) | -0.85 (-1.47 to -0.22) | -3.53 (-4.11 to -2.95) | -3.8 (-4.4 to -3.21) |
| Switzerland | 8.77 (5.21 to 13.62) | 1.82 (1.13 to 2.66) | 27.14 (16.6 to 40.59) | -1.45 (-2.2 to -0.69) | -4.17 (-5.27 to -3.06) | -4.54 (-5.84 to -3.23) |
| Syrian Arab Republic | 3.41 (1.18 to 9.58) | 3.81 (1.34 to 10.67) | 58.41 (20.42 to 162.25) | -0.08 (-0.39 to 0.23) | -1.05 (-1.35 to -0.75) | -1.3 (-1.64 to -0.97) |
| Taiwan (Province of China) | 2.68 (1.57 to 4.19) | 1.32 (0.82 to 1.97) | 21.17 (12.84 to 31.91) | 1.72 (1.22 to 2.23) | -1.01 (-1.43 to -0.59) | -1.05 (-1.46 to -0.64) |
| Tajikistan | 0.44 (0.19 to 0.9) | 0.58 (0.25 to 1.18) | 10.9 (4.67 to 22.09) | -1.95 (-2.35 to -1.54) | -2.07 (-2.45 to -1.68) | -2.09 (-2.46 to -1.73) |
| Thailand | 2.67 (0.95 to 4.97) | 2.53 (0.88 to 4.67) | 40.53 (14.39 to 75.88) | -1.23 (-1.54 to -0.91) | -2.54 (-2.84 to -2.24) | -2.63 (-2.93 to -2.34) |
| Timor-Leste | 1.83 (0.71 to 3.72) | 2.79 (1.07 to 5.77) | 46.37 (18 to 97.01) | -0.7 (-0.82 to -0.57) | -0.88 (-1.11 to -0.66) | -0.96 (-1.18 to -0.74) |
| Togo | 0.14 (0.04 to 0.39) | 0.22 (0.06 to 0.58) | 3.64 (0.99 to 9.89) | 0.54 (0.45 to 0.62) | 0.33 (0.25 to 0.4) | 0.31 (0.23 to 0.4) |
| Tokelau | 3.09 (1.76 to 4.91) | 4.01 (2.23 to 6.43) | 69.52 (39.02 to 110.04) | -0.61 (-0.75 to -0.47) | -1.1 (-1.17 to -1.03) | -1.2 (-1.3 to -1.1) |
| Tonga | 1.64 (0.9 to 2.89) | 2.08 (1.13 to 3.63) | 36.86 (20.12 to 64.62) | -0.15 (-0.41 to 0.12) | -0.46 (-0.76 to -0.16) | -0.56 (-0.87 to -0.25) |
| Trinidad and Tobago | 2.64 (1.89 to 3.6) | 3.27 (2.35 to 4.46) | 54.19 (38.75 to 74.25) | -1.19 (-1.29 to -1.1) | -1.95 (-2.05 to -1.86) | -1.95 (-2.04 to -1.86) |
| Tunisia | 1.64 (0.53 to 4.59) | 1.62 (0.55 to 4.56) | 24.88 (8.32 to 69.2) | -0.04 (-0.18 to 0.11) | -1.23 (-1.45 to -1.02) | -1.41 (-1.54 to -1.28) |
| Turkey | 3.32 (1.55 to 6.65) | 3.2 (1.53 to 6.07) | 48.46 (22.57 to 93.34) | -0.95 (-1.37 to -0.54) | -2.47 (-2.95 to -1.98) | -2.68 (-3.22 to -2.13) |
| Turkmenistan | 0.52 (0.29 to 0.85) | 0.61 (0.35 to 0.99) | 11.55 (6.44 to 18.96) | -1.48 (-2.34 to -0.62) | -2.04 (-2.79 to -1.28) | -2.07 (-2.96 to -1.17) |
| Tuvalu | 3.69 (2.14 to 5.88) | 5.28 (3.08 to 8.42) | 91.56 (53.8 to 143.98) | -0.6 (-0.7 to -0.5) | -0.92 (-0.97 to -0.86) | -0.95 (-1.02 to -0.89) |
| Uganda | 0.35 (0.1 to 0.89) | 0.55 (0.16 to 1.41) | 9.09 (2.65 to 23.67) | -0.13 (-0.18 to -0.09) | -0.3 (-0.34 to -0.26) | -0.39 (-0.43 to -0.34) |
| Ukraine | 2.32 (1.34 to 3.6) | 1.81 (1.1 to 2.77) | 34.74 (20.9 to 53.66) | -0.81 (-1.13 to -0.49) | -1.72 (-2.47 to -0.97) | -1.76 (-2.46 to -1.06) |
| United Arab Emirates | 3.08 (1.19 to 6.41) | 3.27 (1.31 to 6.75) | 54.13 (21.49 to 113.34) | -1.55 (-3.63 to 0.59) | -2.51 (-4.72 to -0.25) | -2.63 (-4.64 to -0.58) |
| United Kingdom | 6.5 (5.8 to 7.1) | 1.46 (1.27 to 1.6) | 21.69 (19.24 to 23.74) | -2.82 (-3.19 to -2.45) | -4.39 (-4.95 to -3.83) | -4.67 (-5.06 to -4.27) |
| United Republic of Tanzania | 0.43 (0.13 to 1.13) | 0.65 (0.2 to 1.68) | 10.97 (3.33 to 29.03) | -1.03 (-1.1 to -0.96) | -1.21 (-1.3 to -1.12) | -1.26 (-1.33 to -1.18) |
| United States of America | 9.96 (8.87 to 10.84) | 2.45 (2.09 to 2.7) | 37.1 (32.42 to 40.47) | -2.37 (-2.81 to -1.92) | -3.27 (-3.51 to -3.03) | -3.62 (-3.83 to -3.42) |
| United States Virgin Islands | 0.8 (0.32 to 1.66) | 1 (0.4 to 2.04) | 14.89 (5.9 to 30.66) | -2.77 (-3.29 to -2.25) | -3.24 (-3.59 to -2.9) | -3.39 (-3.77 to -3.01) |
| Uruguay | 3.51 (2.22 to 5.29) | 3.31 (2.14 to 4.89) | 52.51 (33.47 to 78.05) | -1.58 (-2.1 to -1.04) | -2.63 (-3.2 to -2.06) | -2.79 (-3.32 to -2.26) |
| Uzbekistan | 0.54 (0.32 to 0.89) | 0.69 (0.4 to 1.12) | 12.38 (7.23 to 20.28) | -1.89 (-2.69 to -1.08) | -1.9 (-2.72 to -1.07) | -2.15 (-3 to -1.29) |
| Vanuatu | 2.77 (1.62 to 4.46) | 4.19 (2.42 to 6.76) | 72.97 (42.63 to 116.06) | -0.1 (-0.24 to 0.04) | -0.15 (-0.26 to -0.04) | -0.26 (-0.38 to -0.14) |
| Venezuela (Bolivarian Republic of) | 2.24 (1.54 to 3.1) | 2.8 (1.93 to 3.87) | 45.24 (31 to 62.92) | -1.28 (-1.54 to -1.03) | -1.72 (-1.96 to -1.48) | -2.02 (-2.26 to -1.77) |
| Viet Nam | 0.55 (0.22 to 1.21) | 0.65 (0.27 to 1.42) | 10.29 (4.15 to 22.84) | -0.11 (-0.27 to 0.04) | -1.03 (-1.13 to -0.93) | -1.1 (-1.19 to -1.01) |
| Yemen | 2.47 (0.94 to 5.51) | 3.63 (1.38 to 7.86) | 61 (22.73 to 131.53) | -0.58 (-0.73 to -0.43) | -0.74 (-0.85 to -0.63) | -0.92 (-1.03 to -0.82) |
| Zambia | 0.35 (0.11 to 0.87) | 0.55 (0.17 to 1.35) | 9.2 (2.79 to 22.84) | -1.38 (-1.57 to -1.2) | -1.49 (-1.62 to -1.35) | -1.62 (-1.81 to -1.43) |
| Zimbabwe | 0.13 (0.04 to 0.31) | 0.2 (0.06 to 0.49) | 3.33 (1.03 to 8.16) | 0.01 (-0.49 to 0.51) | -0.14 (-0.68 to 0.4) | 0.1 (-0.49 to 0.69) |

**Abbreviations:** AAPC, average annual percentage change; CI, confidence interval; CML, chronic myeloid leukemia; DALY, disability-adjusted life year; UI, uncertainty interval.

**Supplementary Table S5. Age-standardized DALY rates of CML attributable to specific risk factors in individuals aged ≥65 years and their AAPCs, by SDI level, 1990–2021.**

| SDI quintiles | Age standardized DALY rate in 1990 (per 100,000) (95% UI) | | | | Age standardized DALY rate in 2021 (per 100,000) (95% UI) | | | | AAPCs (1990-2021) (%/year) (95% CI) | | | |
| --- | --- | --- | --- | --- | --- | --- | --- | --- | --- | --- | --- | --- |
| Smoking | High body-mass index | Occupational exposure to benzene | Occupational exposure to formaldehyde | Smoking | High body-mass index | Occupational exposure to benzene | Occupational exposure to formaldehyde | Smoking | High body-mass index | Occupational exposure to benzene | Occupational exposure to formaldehyde |
| Global | 14.32 (5.09 to 23.77) | 5.64 (4.11 to 7.52) | 0.09 (0.03 to 0.16) | 0.02 (0.01 to 0.03) | 3.93 (1.31 to 7.21) | 2.56 (1.76 to 3.46) | 0.05 (0.01 to 0.08) | 0.01 (0.01 to 0.02) | -4.09 (-4.19 to -3.99) | -2.51 (-2.64 to -2.38) | -2.51 (-2.64 to -2.38) | -1.23 (-1.35 to -1.11) |
| High-middle | 12.28 (4.36 to 20.18) | 5.63 (4.08 to 7.58) | 0.08 (0.02 to 0.14) | 0.02 (0.01 to 0.03) | 3.88 (1.33 to 6.95) | 2.64 (1.82 to 3.57) | 0.04 (0.01 to 0.07) | 0.01 (0.01 to 0.02) | -3.61 (-3.84 to -3.37) | -2.38 (-2.66 to -2.09) | -2.38 (-2.66 to -2.09) | -1.79 (-1.92 to -1.65) |
| High | 27.59 (10.16 to 45.42) | 10.03 (7.32 to 13.15) | 0.05 (0.01 to 0.09) | 0.02 (0.01 to 0.03) | 6.15 (1.91 to 11.08) | 3.41 (2.42 to 4.48) | 0.05 (0.02 to 0.1) | 0.02 (0.01 to 0.04) | -4.74 (-4.93 to -4.55) | -3.43 (-3.64 to -3.21) | 0.35 (0.14 to 0.56) | 0.5 (0.22 to 0.77) |
| Low | 2.27 (0.6 to 5.26) | 2.32 (1.49 to 3.33) | 0.03 (0.01 to 0.06) | 0.02 (0.01 to 0.03) | 1.39 (0.38 to 3.02) | 1.96 (1.26 to 2.84) | 0.03 (0.01 to 0.07) | 0.01 (0 to 0.01) | -1.56 (-1.92 to -1.2) | -0.55 (-0.72 to -0.37) | 0.12 (-0.07 to 0.31) | -3.49 (-3.68 to -3.31) |
| Low-middle | 5.53 (1.73 to 11.31) | 1.18 (0.55 to 2.44) | 0.17 (0.03 to 0.32) | 0.02 (0.01 to 0.04) | 3.2 (0.96 to 6.74) | 1.22 (0.63 to 2.21) | 0.06 (0.01 to 0.11) | 0.02 (0.01 to 0.03) | -1.82 (-1.87 to -1.77) | 0.12 (-0.07 to 0.31) | -3.43 (-3.64 to -3.21) | -0.76 (-0.94 to -0.58) |
| Middle | 5.55 (1.93 to 10.18) | 1.94 (1.13 to 3.19) | 0.05 (0.02 to 0.09) | 0.01 (0 to 0.02) | 2.54 (0.82 to 5.12) | 2.16 (1.3 to 3.56) | 0.05 (0.01 to 0.08) | 0.01 (0 to 0.02) | -2.49 (-2.73 to -2.25) | 0.35 (0.14 to 0.56) | -0.55 (-0.72 to -0.37) | 0.37 (0.06 to 0.67) |

**Abbreviations:** AAPC, average annual percentage change; CI, confidence interval; CML, chronic myeloid leukemia; DALY, disability-adjusted life year; SDI, sociodemographic index; UI, uncertainty interval.
